# Supplementary material for: Respiratory Syncytial Virus Outbreak in Infants and Young Children during COVID-19 Pandemic in Taiwan
Source: MDPI journal article supplement (doi:10.3390/children10040629), 2023-03-28
Supplement: s1 [file s1]

Table S1: Annual incidence of RSVH among 0–5-year-old children

|      | 0–1     | 1–2     | 2–3     | 3–4     | 4–5     |
|------|---------|---------|---------|---------|---------|
| 2008 | 1.0300% | 0.3066% | 0.2018% | 0.0476% | 0.0206% |
| 2009 | 0.9518% | 0.1665% | 0.2322% | 0.0644% | 0.0197% |
| 2010 | 1.5297% | 0.2863% | 0.2701% | 0.1205% | 0.0454% |
| 2011 | 1.1433% | 0.2782% | 0.2304% | 0.0688% | 0.0311% |
| 2012 | 0.9774% | 0.2630% | 0.2604% | 0.0793% | 0.0246% |
| 2013 | 1.4852% | 0.2958% | 0.3192% | 0.1081% | 0.0297% |
| 2014 | 1.2300% | 0.2849% | 0.3339% | 0.1298% | 0.0614% |
| 2015 | 1.0986% | 0.2558% | 0.2859% | 0.1246% | 0.0726% |
| 2016 | 1.3196% | 0.3625% | 0.3542% | 0.1490% | 0.0783% |
| 2017 | 1.5509% | 0.3949% | 0.4092% | 0.1944% | 0.0904% |
| 2018 | 1.5952% | 0.4370% | 0.4589% | 0.1808% | 0.1082% |
| 2019 | 1.6729% | 0.3924% | 0.3906% | 0.1553% | 0.0661% |
| 2020 | 1.7113% | 0.7487% | 0.9532% | 0.5924% | 0.3338% |

**Table S2: Monthly AAP of RSVHs among 0–5-year-old children**

| Birth<br>months/Age | AAP    |        |        |        |        |
|---------------------|--------|--------|--------|--------|--------|
|                     | 0–1    | 1–2    | 2–3    | 3–4    | 4–5    |
| 200801              | 3.31%  | 0.00%  | 4.64%  | 4.76%  | 5.77%  |
| 200802              | 5.90%  | 0.00%  | 5.57%  | 7.62%  | 5.77%  |
| 200803              | 10.25% | 0.00%  | 10.44% | 12.38% | 7.69%  |
| 200804              | 9.89%  | 0.00%  | 11.14% | 11.43% | 7.69%  |
| 200805              | 7.40%  | 0.00%  | 5.57%  | 9.52%  | 9.62%  |
| 200806              | 5.12%  | 10.49% | 5.34%  | 7.62%  | 9.62%  |
| 200807              | 6.63%  | 14.71% | 6.73%  | 5.71%  | 9.62%  |
| 200808              | 9.63%  | 18.15% | 11.14% | 6.67%  | 5.77%  |
| 200809              | 13.92% | 22.07% | 12.76% | 10.48% | 21.15% |
| 200810              | 14.03% | 23.32% | 9.74%  | 5.71%  | 5.77%  |
| 200811              | 9.11%  | 11.27% | 5.80%  | 2.86%  | 5.77%  |
| 200812              | 4.81%  | 0.00%  | 11.14% | 15.24% | 5.77%  |
| 200901              | 3.91%  | 0.89%  | 4.67%  | 9.63%  | 6.52%  |
| 200902              | 6.10%  | 3.85%  | 7.71%  | 4.44%  | 6.52%  |
| 200903              | 8.63%  | 4.44%  | 9.74%  | 9.63%  | 8.70%  |
| 200904              | 10.82% | 5.62%  | 13.39% | 10.37% | 10.87% |
| 200905              | 7.02%  | 2.66%  | 6.49%  | 6.67%  | 10.87% |
| 200906              | 5.29%  | 3.85%  | 3.65%  | 3.70%  | 6.52%  |
| 200907              | 5.81%  | 7.69%  | 3.45%  | 5.93%  | 0.00%  |
| 200908              | 9.72%  | 11.24% | 9.53%  | 5.93%  | 15.22% |
| 200909              | 16.51% | 24.85% | 18.66% | 19.26% | 6.52%  |
| 200910              | 12.37% | 17.46% | 13.79% | 11.85% | 13.04% |
| 200911              | 8.06%  | 10.95% | 6.09%  | 4.44%  | 6.52%  |
| 200912              | 5.75%  | 6.51%  | 2.84%  | 8.15%  | 8.70%  |
| 201001              | 7.23%  | 5.59%  | 4.59%  | 11.46% | 8.33%  |
| 201002              | 9.39%  | 6.82%  | 10.28% | 14.23% | 11.46% |
| 201003              | 18.45% | 19.93% | 15.05% | 18.58% | 18.75% |
| 201004              | 13.92% | 12.59% | 10.64% | 11.07% | 12.50% |
| 201005              | 6.32%  | 6.64%  | 5.87%  | 7.91%  | 6.25%  |
| 201006              | 3.41%  | 5.07%  | 4.22%  | 2.77%  | 3.13%  |
| 201007              | 4.78%  | 4.72%  | 4.77%  | 2.77%  | 3.13%  |
| 201008              | 6.36%  | 8.74%  | 4.59%  | 4.74%  | 7.29%  |
| 201009              | 8.65%  | 11.19% | 10.83% | 9.49%  | 8.33%  |

|        |        |        |        |        |        |
|--------|--------|--------|--------|--------|--------|
| 201010 | 10.47% | 8.74%  | 13.39% | 10.28% | 7.29%  |
| 201011 | 6.03%  | 5.94%  | 6.97%  | 3.95%  | 5.21%  |
| 201012 | 4.99%  | 4.02%  | 8.81%  | 2.77%  | 8.33%  |
| 201101 | 5.74%  | 3.97%  | 9.07%  | 7.80%  | 12.68% |
| 201102 | 7.93%  | 4.38%  | 7.78%  | 4.26%  | 4.23%  |
| 201103 | 9.47%  | 7.72%  | 6.91%  | 7.80%  | 7.04%  |
| 201104 | 6.35%  | 7.10%  | 4.32%  | 7.09%  | 7.04%  |
| 201105 | 4.53%  | 4.18%  | 3.67%  | 8.51%  | 7.04%  |
| 201106 | 5.27%  | 4.80%  | 4.10%  | 4.96%  | 4.23%  |
| 201107 | 8.59%  | 10.86% | 7.78%  | 6.38%  | 12.68% |
| 201108 | 12.74% | 16.28% | 12.96% | 16.31% | 8.45%  |
| 201109 | 14.93% | 15.45% | 18.14% | 18.44% | 14.08% |
| 201110 | 11.62% | 11.90% | 12.74% | 8.51%  | 14.08% |
| 201111 | 7.65%  | 9.39%  | 6.91%  | 5.67%  | 4.23%  |
| 201112 | 5.18%  | 3.97%  | 5.62%  | 4.26%  | 4.23%  |
| 201201 | 6.21%  | 3.35%  | 5.17%  | 2.56%  | 5.56%  |
| 201202 | 9.81%  | 7.92%  | 10.12% | 16.03% | 5.56%  |
| 201203 | 13.69% | 12.50% | 15.08% | 13.46% | 9.26%  |
| 201204 | 10.56% | 12.50% | 15.08% | 13.46% | 9.26%  |
| 201205 | 9.67%  | 7.04%  | 8.47%  | 3.21%  | 5.56%  |
| 201206 | 5.09%  | 6.51%  | 3.51%  | 3.21%  | 7.41%  |
| 201207 | 5.42%  | 6.69%  | 4.55%  | 7.05%  | 5.56%  |
| 201208 | 7.06%  | 9.33%  | 4.34%  | 10.26% | 5.56%  |
| 201209 | 11.31% | 12.32% | 14.88% | 9.62%  | 25.93% |
| 201210 | 9.39%  | 9.15%  | 6.20%  | 8.97%  | 5.56%  |
| 201211 | 5.65%  | 7.57%  | 4.75%  | 3.85%  | 9.26%  |
| 201212 | 6.12%  | 5.11%  | 7.85%  | 8.33%  | 5.56%  |
| 201301 | 10.15% | 7.14%  | 9.23%  | 11.11% | 16.39% |
| 201302 | 12.31% | 7.70%  | 12.10% | 10.58% | 11.48% |
| 201303 | 12.35% | 6.44%  | 9.53%  | 7.41%  | 8.20%  |
| 201304 | 7.29%  | 4.34%  | 3.93%  | 2.65%  | 4.92%  |
| 201305 | 6.63%  | 3.50%  | 6.35%  | 6.35%  | 4.92%  |
| 201306 | 6.34%  | 6.30%  | 6.35%  | 3.70%  | 0.00%  |
| 201307 | 7.29%  | 11.06% | 6.81%  | 8.99%  | 8.20%  |
| 201308 | 9.56%  | 12.75% | 9.38%  | 6.35%  | 13.11% |
| 201309 | 11.43% | 17.09% | 14.07% | 16.40% | 18.03% |
| 201310 | 8.79%  | 13.31% | 9.68%  | 8.99%  | 9.84%  |

|        |        |        |        |        |        |
|--------|--------|--------|--------|--------|--------|
| 201311 | 4.80%  | 7.42%  | 6.20%  | 10.05% | 4.92%  |
| 201312 | 3.04%  | 2.94%  | 6.35%  | 7.41%  | 0.00%  |
| 201401 | 3.26%  | 2.78%  | 3.45%  | 4.07%  | 2.68%  |
| 201402 | 4.49%  | 2.96%  | 4.43%  | 2.59%  | 0.00%  |
| 201403 | 7.63%  | 7.83%  | 9.24%  | 5.93%  | 2.68%  |
| 201404 | 8.32%  | 7.30%  | 7.39%  | 6.67%  | 2.68%  |
| 201405 | 8.36%  | 6.26%  | 6.65%  | 7.78%  | 7.14%  |
| 201406 | 11.34% | 8.87%  | 8.25%  | 10.00% | 11.61% |
| 201407 | 16.40% | 19.30% | 16.26% | 12.22% | 16.07% |
| 201408 | 15.83% | 18.26% | 16.38% | 19.63% | 16.07% |
| 201409 | 12.20% | 14.43% | 12.81% | 11.48% | 16.07% |
| 201410 | 7.59%  | 7.13%  | 7.76%  | 7.41%  | 8.04%  |
| 201411 | 2.33%  | 2.26%  | 3.82%  | 5.93%  | 8.04%  |
| 201412 | 2.24%  | 2.61%  | 3.57%  | 6.30%  | 8.93%  |
| 201501 | 1.58%  | 2.50%  | 3.27%  | 6.15%  | 8.70%  |
| 201502 | 2.71%  | 1.78%  | 1.72%  | 3.24%  | 6.83%  |
| 201503 | 3.79%  | 3.21%  | 3.96%  | 3.88%  | 6.83%  |
| 201504 | 6.50%  | 6.06%  | 5.85%  | 9.39%  | 8.07%  |
| 201505 | 8.72%  | 8.56%  | 9.64%  | 10.03% | 6.83%  |
| 201506 | 13.91% | 8.38%  | 10.15% | 10.36% | 6.83%  |
| 201507 | 16.03% | 17.11% | 12.05% | 9.39%  | 13.66% |
| 201508 | 13.37% | 18.54% | 14.46% | 13.27% | 9.94%  |
| 201509 | 14.41% | 14.26% | 15.83% | 13.59% | 8.70%  |
| 201510 | 8.94%  | 10.70% | 9.64%  | 11.97% | 12.42% |
| 201511 | 5.01%  | 6.06%  | 7.40%  | 4.85%  | 5.59%  |
| 201512 | 5.01%  | 2.85%  | 6.02%  | 3.88%  | 5.59%  |
| 201601 | 4.27%  | 4.20%  | 4.29%  | 4.82%  | 4.46%  |
| 201602 | 5.20%  | 3.95%  | 5.05%  | 4.82%  | 3.47%  |
| 201603 | 8.28%  | 7.41%  | 7.58%  | 7.72%  | 4.95%  |
| 201604 | 9.85%  | 8.02%  | 10.35% | 12.86% | 8.91%  |
| 201605 | 12.20% | 14.57% | 11.24% | 8.36%  | 5.94%  |
| 201606 | 10.47% | 9.63%  | 11.36% | 10.29% | 7.43%  |
| 201607 | 11.28% | 13.95% | 9.85%  | 8.04%  | 15.35% |
| 201608 | 9.97%  | 10.00% | 9.85%  | 8.36%  | 9.41%  |
| 201609 | 8.08%  | 8.64%  | 8.59%  | 11.90% | 14.85% |
| 201610 | 7.97%  | 8.02%  | 8.33%  | 10.61% | 12.38% |
| 201611 | 7.01%  | 7.53%  | 7.83%  | 5.47%  | 5.45%  |

|        |        |        |        |        |        |
|--------|--------|--------|--------|--------|--------|
| 201612 | 5.43%  | 4.07%  | 5.68%  | 6.75%  | 7.43%  |
| 201701 | 4.32%  | 4.30%  | 3.55%  | 5.28%  | 7.85%  |
| 201702 | 4.32%  | 2.33%  | 3.66%  | 2.06%  | 1.57%  |
| 201703 | 4.57%  | 3.60%  | 5.48%  | 3.21%  | 7.33%  |
| 201704 | 5.27%  | 5.35%  | 4.84%  | 6.19%  | 8.38%  |
| 201705 | 7.42%  | 5.81%  | 6.34%  | 6.42%  | 5.76%  |
| 201706 | 8.68%  | 5.58%  | 6.88%  | 5.96%  | 6.81%  |
| 201707 | 12.51% | 14.65% | 12.04% | 10.55% | 8.38%  |
| 201708 | 14.41% | 17.56% | 13.33% | 14.91% | 16.23% |
| 201709 | 16.17% | 17.67% | 18.28% | 21.56% | 13.61% |
| 201710 | 12.83% | 14.19% | 14.30% | 12.39% | 14.14% |
| 201711 | 5.69%  | 6.51%  | 6.77%  | 5.73%  | 5.76%  |
| 201712 | 3.80%  | 2.44%  | 4.52%  | 5.73%  | 4.19%  |
| 201801 | 4.63%  | 3.73%  | 5.00%  | 3.69%  | 6.64%  |
| 201802 | 3.42%  | 3.16%  | 2.20%  | 2.70%  | 1.66%  |
| 201803 | 6.06%  | 3.62%  | 5.09%  | 6.88%  | 4.98%  |
| 201804 | 4.78%  | 3.95%  | 5.49%  | 3.44%  | 7.05%  |
| 201805 | 4.85%  | 4.75%  | 4.60%  | 5.65%  | 4.98%  |
| 201806 | 6.10%  | 4.07%  | 6.79%  | 5.16%  | 4.56%  |
| 201807 | 10.00% | 15.14% | 11.19% | 10.07% | 9.54%  |
| 201808 | 15.91% | 18.87% | 17.58% | 18.67% | 19.50% |
| 201809 | 21.90% | 20.68% | 19.98% | 23.34% | 21.58% |
| 201810 | 13.30% | 14.35% | 12.19% | 10.07% | 8.30%  |
| 201811 | 5.51%  | 5.76%  | 5.39%  | 6.88%  | 5.81%  |
| 201812 | 3.53%  | 1.92%  | 4.50%  | 3.44%  | 5.39%  |
| 201901 | 2.84%  | 2.46%  | 4.81%  | 6.51%  | 5.48%  |
| 201902 | 2.35%  | 1.77%  | 2.78%  | 6.21%  | 3.42%  |
| 201903 | 4.37%  | 3.27%  | 5.57%  | 4.73%  | 4.11%  |
| 201904 | 5.12%  | 4.64%  | 5.19%  | 5.62%  | 5.48%  |
| 201905 | 5.47%  | 4.91%  | 6.08%  | 5.92%  | 6.85%  |
| 201906 | 6.97%  | 5.05%  | 5.19%  | 4.14%  | 5.48%  |
| 201907 | 11.76% | 15.69% | 10.38% | 9.17%  | 5.48%  |
| 201908 | 19.08% | 19.65% | 20.51% | 18.34% | 16.44% |
| 201909 | 21.04% | 21.56% | 22.03% | 19.53% | 24.66% |
| 201910 | 14.50% | 14.19% | 10.38% | 11.54% | 15.75% |
| 201911 | 4.30%  | 4.91%  | 4.81%  | 4.44%  | 3.42%  |
| 201912 | 2.20%  | 1.91%  | 2.28%  | 3.85%  | 3.42%  |

|        |        |        |        |        |        |
|--------|--------|--------|--------|--------|--------|
| 202001 | 2.41%  | 1.03%  | 1.23%  | 0.59%  | 1.67%  |
| 202002 | 1.78%  | 1.40%  | 0.67%  | 0.25%  | 0.42%  |
| 202003 | 0.82%  | 1.18%  | 0.56%  | 0.59%  | 0.42%  |
| 202004 | 0.33%  | 0.44%  | 0.50%  | 1.09%  | 0.69%  |
| 202005 | 0.74%  | 0.44%  | 0.39%  | 0.25%  | 0.42%  |
| 202006 | 0.41%  | 0.59%  | 0.45%  | 0.67%  | 0.56%  |
| 202007 | 0.78%  | 1.40%  | 0.50%  | 0.59%  | 0.56%  |
| 202008 | 1.34%  | 1.91%  | 1.51%  | 1.18%  | 0.83%  |
| 202009 | 5.42%  | 4.42%  | 4.60%  | 3.87%  | 3.61%  |
| 202010 | 18.61% | 20.47% | 19.11% | 16.47% | 15.14% |
| 202011 | 38.45% | 45.43% | 41.65% | 43.28% | 41.11% |
| 202012 | 28.90% | 21.28% | 28.81% | 31.18% | 34.58% |

**Table S3: RSVH risk among different birth months for one- (A), two- (B), and three- (C) year-olds.**

| Birth months | First year | Second year | Third year |
|--------------|------------|-------------|------------|
| 200801       | 0.92%      | 0.39%       | 0.15%      |
| 200802       | 0.96%      | 0.30%       | 0.13%      |
| 200803       | 0.81%      | 0.41%       | 0.14%      |
| 200804       | 0.85%      | 0.45%       | 0.13%      |
| 200805       | 0.92%      | 0.29%       | 0.09%      |
| 200806       | 1.01%      | 0.53%       | 0.16%      |
| 200807       | 1.05%      | 0.45%       | 0.11%      |
| 200808       | 0.95%      | 0.48%       | 0.19%      |
| 200809       | 0.86%      | 0.53%       | 0.15%      |
| 200810       | 0.77%      | 0.43%       | 0.11%      |
| 200811       | 0.81%      | 0.53%       | 0.12%      |
| 200812       | 0.82%      | 0.56%       | 0.06%      |
| 200901       | 0.83%      | 0.52%       | 0.10%      |
| 200902       | 0.95%      | 0.53%       | 0.11%      |
| 200903       | 0.93%      | 0.49%       | 0.11%      |
| 200904       | 0.93%      | 0.34%       | 0.13%      |
| 200905       | 1.16%      | 0.32%       | 0.13%      |
| 200906       | 1.21%      | 0.44%       | 0.19%      |
| 200907       | 1.35%      | 0.36%       | 0.12%      |
| 200908       | 1.12%      | 0.37%       | 0.16%      |
| 200909       | 1.15%      | 0.36%       | 0.15%      |
| 200910       | 1.04%      | 0.40%       | 0.08%      |
| 200911       | 1.25%      | 0.32%       | 0.11%      |
| 200912       | 1.28%      | 0.31%       | 0.17%      |
| 201001       | 1.49%      | 0.48%       | 0.15%      |
| 201002       | 1.59%      | 0.52%       | 0.12%      |
| 201003       | 1.10%      | 0.50%       | 0.08%      |
| 201004       | 1.14%      | 0.48%       | 0.11%      |
| 201005       | 0.92%      | 0.59%       | 0.14%      |
| 201006       | 1.23%      | 0.59%       | 0.10%      |
| 201007       | 1.26%      | 0.58%       | 0.11%      |
| 201008       | 1.15%      | 0.50%       | 0.22%      |
| 201009       | 0.90%      | 0.42%       | 0.17%      |
| 201010       | 0.95%      | 0.47%       | 0.09%      |
| 201011       | 1.14%      | 0.38%       | 0.17%      |

|        |       |       |       |
|--------|-------|-------|-------|
| 201012 | 1.10% | 0.48% | 0.25% |
| 201101 | 1.21% | 0.43% | 0.12% |
| 201102 | 0.92% | 0.44% | 0.12% |
| 201103 | 1.15% | 0.35% | 0.17% |
| 201104 | 1.03% | 0.34% | 0.18% |
| 201105 | 1.23% | 0.37% | 0.13% |
| 201106 | 1.31% | 0.39% | 0.20% |
| 201107 | 1.21% | 0.36% | 0.19% |
| 201108 | 1.09% | 0.43% | 0.24% |
| 201109 | 1.00% | 0.46% | 0.16% |
| 201110 | 1.04% | 0.43% | 0.15% |
| 201111 | 1.05% | 0.43% | 0.16% |
| 201112 | 1.21% | 0.41% | 0.22% |
| 201201 | 0.95% | 0.52% | 0.20% |
| 201202 | 0.88% | 0.56% | 0.22% |
| 201203 | 0.98% | 0.43% | 0.19% |
| 201204 | 0.92% | 0.44% | 0.16% |
| 201205 | 0.98% | 0.49% | 0.25% |
| 201206 | 1.03% | 0.47% | 0.17% |
| 201207 | 1.09% | 0.58% | 0.16% |
| 201208 | 1.02% | 0.56% | 0.22% |
| 201209 | 0.98% | 0.43% | 0.15% |
| 201210 | 1.05% | 0.49% | 0.18% |
| 201211 | 1.23% | 0.43% | 0.16% |
| 201212 | 1.20% | 0.44% | 0.20% |
| 201301 | 1.12% | 0.45% | 0.15% |
| 201302 | 0.95% | 0.49% | 0.16% |
| 201303 | 1.02% | 0.57% | 0.19% |
| 201304 | 1.00% | 0.55% | 0.30% |
| 201305 | 1.09% | 0.60% | 0.16% |
| 201306 | 1.28% | 0.52% | 0.26% |
| 201307 | 1.17% | 0.47% | 0.18% |
| 201308 | 1.03% | 0.47% | 0.18% |
| 201309 | 1.14% | 0.30% | 0.18% |
| 201310 | 1.02% | 0.39% | 0.22% |
| 201311 | 1.00% | 0.42% | 0.22% |
| 201312 | 1.27% | 0.45% | 0.19% |



|        |       |       |       |
|--------|-------|-------|-------|
| 201401 | 1.37% | 0.46% | 0.20% |
| 201402 | 1.20% | 0.45% | 0.22% |
| 201403 | 1.18% | 0.48% | 0.19% |
| 201404 | 1.11% | 0.65% | 0.18% |
| 201405 | 1.17% | 0.51% | 0.17% |
| 201406 | 1.21% | 0.55% | 0.20% |
| 201407 | 1.00% | 0.60% | 0.18% |
| 201408 | 0.87% | 0.54% | 0.19% |
| 201409 | 0.76% | 0.46% | 0.24% |
| 201410 | 0.77% | 0.52% | 0.19% |
| 201411 | 0.83% | 0.53% | 0.28% |
| 201412 | 0.91% | 0.50% | 0.22% |
| 201501 | 0.95% | 0.55% | 0.27% |
| 201502 | 1.07% | 0.61% | 0.26% |
| 201503 | 1.13% | 0.48% | 0.19% |
| 201504 | 1.25% | 0.61% | 0.18% |
| 201505 | 1.32% | 0.56% | 0.29% |
| 201506 | 1.39% | 0.52% | 0.31% |
| 201507 | 1.07% | 0.45% | 0.31% |
| 201508 | 0.98% | 0.56% | 0.37% |
| 201509 | 1.10% | 0.61% | 0.22% |
| 201510 | 0.98% | 0.50% | 0.28% |
| 201511 | 1.14% | 0.60% | 0.20% |
| 201512 | 1.20% | 0.46% | 0.24% |
| 201601 | 1.18% | 0.55% | 0.23% |
| 201602 | 1.25% | 0.56% | 0.28% |
| 201603 | 1.14% | 0.75% | 0.32% |
| 201604 | 1.09% | 0.64% | 0.26% |
| 201605 | 1.23% | 0.65% | 0.25% |
| 201606 | 1.19% | 0.74% | 0.34% |
| 201607 | 1.15% | 0.59% | 0.30% |
| 201608 | 1.18% | 0.65% | 0.27% |
| 201609 | 1.06% | 0.58% | 0.20% |
| 201610 | 1.19% | 0.62% | 0.17% |
| 201611 | 1.14% | 0.58% | 0.22% |
| 201612 | 1.47% | 0.63% | 0.19% |
| 201701 | 1.15% | 0.78% | 0.29% |

|        |       |       |       |
|--------|-------|-------|-------|
| 201702 | 1.27% | 0.59% | 0.19% |
| 201703 | 1.36% | 0.79% | 0.22% |
| 201704 | 1.61% | 0.73% | 0.29% |
| 201705 | 1.47% | 0.76% | 0.20% |
| 201706 | 1.46% | 0.65% | 0.23% |
| 201707 | 1.37% | 0.64% | 0.23% |
| 201708 | 1.40% | 0.71% | 0.16% |
| 201709 | 0.97% | 0.55% | 0.13% |
| 201710 | 1.24% | 0.50% | 0.15% |
| 201711 | 1.36% | 0.64% | 0.45% |
| 201712 | 1.81% | 0.67% | 0.82% |
| 201801 | 1.30% | 0.55% | 0.62% |
| 201802 | 1.39% | 0.62% | 0.61% |
| 201803 | 1.35% | 0.65% | 0.74% |
| 201804 | 1.51% | 0.56% | 0.70% |
| 201805 | 1.55% | 0.59% | 0.74% |
| 201806 | 1.80% | 0.66% | 0.61% |
| 201807 | 1.49% | 0.54% | 0.82% |
| 201808 | 1.07% | 0.44% | 0.93% |
| 201809 | 1.17% | 0.33% | 0.72% |
| 201810 | 1.09% | 0.47% | 0.74% |
| 201811 | 1.37% | 0.79% | 0.28% |
| 201812 | 1.65% | 1.03% | 0.00% |
